# Supplementary material for: Multi-Dimensional Liquid Chromatography of Pulse Triacylglycerols with Triple Parallel Mass Spectrometry
Source: MDPI journal article supplement (doi:10.3390/separations10120594), 2023-12-05
Supplement: s1 [file s1]

Supplementary Materials for Multi-Dimensional Liquid Chromatography of Pulse Tri-  
acylglycerols with Triple Parallel Mass Spectrometry

William Byrdwell and Hari Kiran Kotapati

**Supplementary Table S1.** Concentrations of fat-soluble vitamins (FSVs) and triacylglycerols (TAGs) in final calibration standard mixtures.

|                   | Std. 1 [1,3 Isomers] |         |        | Std. 2 [1,2 Isomers] |         |        | Std. 3 [1,3 Isomers] |         |        | Std. 4 [1,2 Isomers] |         |        | Std. 5 [1,3 Isomers] |         |        |
|-------------------|----------------------|---------|--------|----------------------|---------|--------|----------------------|---------|--------|----------------------|---------|--------|----------------------|---------|--------|
|                   | µg/mL                | nMol/mL | Wt. %  |
| Vit. K2           | 2.00100              | 4.50021 | 80.29% | 2.00100              | 4.50021 | 67.07% | 2.00100              | 4.50021 | 44.89% | 2.00100              | 4.50021 | 28.94% | 2.00100              | 4.50021 | 16.92% |
| Vitamin D2        | 0.05002              | 0.12609 | 2.25%  | 0.10003              | 0.25219 | 3.76%  | 0.25008              | 0.63047 | 6.29%  | 0.50015              | 1.26094 | 8.11%  | 1.00030              | 2.52189 | 9.48%  |
| Vitamin D3        | 0.05001              | 0.13001 | 2.32%  | 0.10001              | 0.26001 | 3.88%  | 0.25003              | 0.65003 | 6.48%  | 0.50005              | 1.30006 | 8.36%  | 1.00010              | 2.60012 | 9.78%  |
| α-Tocopherol      | 0.05000              | 0.11609 | 2.07%  | 0.10000              | 0.23218 | 3.46%  | 0.25000              | 0.58044 | 5.79%  | 0.50000              | 1.16089 | 7.47%  | 1.00000              | 2.32178 | 8.73%  |
| δ-Tocopherol      | 0.05000              | 0.12418 | 2.22%  | 0.10000              | 0.24835 | 3.70%  | 0.25000              | 0.62088 | 6.19%  | 0.50000              | 1.24177 | 7.99%  | 1.00000              | 2.48354 | 9.34%  |
| γ-Tocopherol      | 0.05000              | 0.12000 | 2.14%  | 0.10000              | 0.23999 | 3.58%  | 0.25000              | 0.59998 | 5.99%  | 0.50000              | 1.19997 | 7.72%  | 1.00000              | 2.39993 | 9.02%  |
| α-Toco Acetate    | 0.05000              | 0.10714 | 1.91%  | 0.10000              | 0.21427 | 3.19%  | 0.25000              | 0.53568 | 5.34%  | 0.50000              | 1.07137 | 6.89%  | 1.00000              | 2.14273 | 8.06%  |
| Retinol           | 0.05012              | 0.17497 | 3.12%  | 0.10024              | 0.34994 | 5.22%  | 0.25060              | 0.87485 | 8.73%  | 0.50120              | 1.74969 | 11.25% | 1.00240              | 3.49938 | 13.16% |
| Retinyl Palmitate | 0.05000              | 0.09526 | 1.70%  | 0.10000              | 0.19053 | 2.84%  | 0.25000              | 0.47632 | 4.75%  | 0.50000              | 0.95264 | 6.13%  | 1.00000              | 1.90527 | 7.16%  |
| Phylloquinone     | 0.05007              | 0.11110 | 1.98%  | 0.10014              | 0.22219 | 3.31%  | 0.25035              | 0.55548 | 5.54%  | 0.50070              | 1.11095 | 7.15%  | 1.00140              | 2.22191 | 8.35%  |
| 7,7,7             | 8.835                | 20.614  | 8.47%  | 8.835                | 20.614  | 5.21%  | 8.835                | 20.614  | 2.84%  | 8.835                | 20.614  | 1.25%  | 8.835                | 20.614  | 0.62%  |
| 11,11,11          | 12.305               | 20.614  | 8.47%  | 12.305               | 20.614  | 5.21%  | 12.305               | 20.614  | 2.84%  | 12.305               | 20.614  | 1.25%  | 12.305               | 20.614  | 0.62%  |
| 15,15,15          | 15.770               | 20.608  | 8.47%  | 15.770               | 20.608  | 5.20%  | 15.770               | 20.608  | 2.84%  | 15.770               | 20.608  | 1.25%  | 15.770               | 20.608  | 0.62%  |
| 19,19,19          | 19.235               | 20.604  | 8.47%  | 19.235               | 20.604  | 5.20%  | 19.235               | 20.604  | 2.84%  | 19.235               | 20.604  | 1.25%  | 19.235               | 20.604  | 0.62%  |
| 9,9,9             | 2.114                | 4.123   | 1.69%  | 4.230                | 8.249   | 2.08%  | 8.456                | 16.491  | 2.27%  | 21.150               | 41.247  | 2.50%  | 42.280               | 82.456  | 2.50%  |
| 13,13,13          | 2.807                | 4.121   | 1.69%  | 5.612                | 8.240   | 2.08%  | 11.228               | 16.486  | 2.27%  | 28.060               | 41.199  | 2.50%  | 56.140               | 82.428  | 2.50%  |
| 17,17,17          | 3.500                | 4.121   | 1.69%  | 7.000                | 8.241   | 2.08%  | 14.000               | 16.482  | 2.27%  | 35.000               | 41.206  | 2.50%  | 70.000               | 82.411  | 2.50%  |
| 21,21,21          | 4.195                | 4.122   | 1.69%  | 8.390                | 8.244   | 2.08%  | 16.780               | 16.488  | 2.27%  | 41.950               | 41.220  | 2.50%  | 83.900               | 82.439  | 2.50%  |
| CaMCa/CaCaM       | 2.510                | 4.108   | 1.69%  | 5.180                | 8.479   | 2.14%  | 10.040               | 16.434  | 2.26%  | 25.900               | 42.393  | 2.57%  | 50.200               | 82.168  | 2.49%  |
| LaMLa/LaLaM       | 5.010                | 7.511   | 3.09%  | 5.100                | 7.646   | 1.93%  | 20.040               | 30.043  | 4.14%  | 25.500               | 38.228  | 2.32%  | 100.200              | 150.213 | 4.55%  |
| LaPLa/LaLaP       | 5.020                | 7.222   | 2.97%  | 10.060               | 14.473  | 3.65%  | 20.080               | 28.888  | 3.98%  | 50.300               | 72.363  | 4.38%  | 100.400              | 144.438 | 4.37%  |
| LaOLa/LaLaO       | 5.020                | 6.961   | 2.86%  | 10.020               | 13.895  | 3.51%  | 20.080               | 27.845  | 3.83%  | 50.100               | 69.473  | 4.21%  | 100.400              | 139.223 | 4.22%  |
| PLP/PPL           | 2.730                | 3.284   | 1.35%  | 5.160                | 6.207   | 1.57%  | 10.920               | 13.135  | 1.81%  | 25.800               | 31.034  | 1.88%  | 54.600               | 65.677  | 1.99%  |
| POP/PPO           | 2.660                | 3.192   | 1.31%  | 5.260                | 6.312   | 1.59%  | 10.640               | 12.768  | 1.76%  | 26.300               | 31.559  | 1.91%  | 53.200               | 63.838  | 1.93%  |
| LPL/LLP           | 2.510                | 2.934   | 1.21%  | 5.020                | 5.869   | 1.48%  | 10.040               | 11.738  | 1.62%  | 25.100               | 29.344  | 1.78%  | 50.200               | 58.689  | 1.78%  |
| OPO/OOP           | 2.620                | 3.049   | 1.25%  | 5.040                | 5.865   | 1.48%  | 10.480               | 12.195  | 1.68%  | 25.200               | 29.323  | 1.78%  | 52.400               | 60.973  | 1.85%  |
| LOL/LLO           | 2.520                | 2.859   | 1.17%  | 5.680                | 6.444   | 1.63%  | 10.080               | 11.436  | 1.57%  | 28.400               | 32.222  | 1.95%  | 50.400               | 57.182  | 1.73%  |
| OLO/OOL           | 2.600                | 2.943   | 1.21%  | 5.140                | 5.818   | 1.47%  | 10.400               | 11.773  | 1.62%  | 25.700               | 29.092  | 1.76%  | 52.000               | 58.863  | 1.78%  |
| OSO/OOS           | 2.540                | 2.862   | 1.18%  | 5.120                | 5.769   | 1.46%  | 10.160               | 11.449  | 1.58%  | 25.600               | 28.847  | 1.75%  | 50.800               | 57.243  | 1.73%  |

|                    |         |         |         |         |         |         |         |         |         |          |          |         |          |          |         |
|--------------------|---------|---------|---------|---------|---------|---------|---------|---------|---------|----------|----------|---------|----------|----------|---------|
| SOS/SSO            | 2.570   | 2.889   | 1.19%   | 5.240   | 5.891   | 1.49%   | 10.280  | 11.558  | 1.59%   | 26.200   | 29.456   | 1.78%   | 51.400   | 57.788   | 1.75%   |
| OA0/OOA            | 2.510   | 2.742   | 1.13%   | 5.020   | 5.483   | 1.38%   | 10.040  | 10.967  | 1.51%   | 25.100   | 27.417   | 1.66%   | 50.200   | 54.833   | 1.66%   |
| ODhO/ODh           | 2.730   | 2.931   | 1.20%   | 5.040   | 5.411   | 1.37%   | 10.920  | 11.724  | 1.61%   | 25.200   | 27.054   | 1.64%   | 54.600   | 58.618   | 1.78%   |
| POLa/OLaP          | 2.720   | 3.500   | 1.44%   | 5.080   | 6.536   | 1.65%   | 10.880  | 13.998  | 1.93%   | 25.400   | 32.679   | 1.98%   | 54.400   | 69.990   | 2.12%   |
| PLO/OPL            | 2.740   | 3.196   | 1.31%   | 5.360   | 6.252   | 1.58%   | 10.960  | 12.783  | 1.76%   | 26.800   | 31.258   | 1.89%   | 54.800   | 63.916   | 1.94%   |
| POS/SPO            | 2.580   | 2.995   | 1.23%   | 5.160   | 5.990   | 1.51%   | 10.320  | 11.980  | 1.65%   | 25.800   | 29.951   | 1.81%   | 51.600   | 59.902   | 1.81%   |
| SLO/SOL            | 2.680   | 3.027   | 1.24%   | 5.060   | 5.715   | 1.44%   | 10.720  | 12.107  | 1.67%   | 25.300   | 28.574   | 1.73%   | 53.600   | 60.536   | 1.83%   |
| AcAcAc             | 2.000   | 9.166   | 3.77%   | 4.000   | 18.332  | 4.63%   | 8.000   | 36.663  | 5.05%   | 20.000   | 91.658   | 5.55%   | 40.000   | 183.315  | 5.55%   |
| BuBuBu             | 2.000   | 6.615   | 2.72%   | 4.000   | 13.229  | 3.34%   | 8.000   | 26.458  | 3.64%   | 20.000   | 66.146   | 4.01%   | 40.000   | 132.291  | 4.01%   |
| CoCoCo             | 3.667   | 9.486   | 3.90%   | 7.333   | 18.973  | 4.79%   | 14.667  | 37.945  | 5.22%   | 36.667   | 94.863   | 5.75%   | 73.333   | 189.726  | 5.75%   |
| CyCyCy             | 5.667   | 12.039  | 4.95%   | 11.333  | 24.079  | 6.08%   | 22.667  | 48.157  | 6.63%   | 56.667   | 120.393  | 7.30%   | 113.333  | 240.786  | 7.29%   |
| CaCaCa             | 5.667   | 10.213  | 4.20%   | 11.333  | 20.426  | 5.16%   | 22.667  | 40.853  | 5.62%   | 56.667   | 102.131  | 6.19%   | 113.333  | 204.263  | 6.19%   |
| LaLaLa             | 3.667   | 5.738   | 2.36%   | 7.333   | 11.476  | 2.90%   | 14.667  | 22.953  | 3.16%   | 36.667   | 57.381   | 3.48%   | 73.333   | 114.763  | 3.48%   |
| MMM                | 3.667   | 5.070   | 2.08%   | 7.333   | 10.141  | 2.56%   | 14.667  | 20.281  | 2.79%   | 36.667   | 50.703   | 3.07%   | 73.333   | 101.407  | 3.07%   |
| PPP                | 2.000   | 2.477   | 1.02%   | 4.000   | 4.955   | 1.25%   | 8.000   | 9.909   | 1.36%   | 20.000   | 24.773   | 1.50%   | 40.000   | 49.547   | 1.50%   |
| SSS                | 1.667   | 1.870   | 0.77%   | 3.333   | 3.739   | 0.94%   | 6.667   | 7.478   | 1.03%   | 16.667   | 18.696   | 1.13%   | 33.333   | 37.391   | 1.13%   |
| OOO                | 7.002   | 7.908   | 3.25%   | 14.008  | 15.821  | 4.00%   | 28.008  | 31.632  | 4.36%   | 70.040   | 79.103   | 4.79%   | 140.040  | 158.160  | 4.79%   |
| LLL                | 5.000   | 5.686   | 2.34%   | 10.000  | 11.372  | 2.87%   | 20.000  | 22.743  | 3.13%   | 50.000   | 56.858   | 3.45%   | 100.000  | 113.716  | 3.44%   |
|                    |         |         |         |         |         |         |         |         |         |          |          |         |          |          |         |
| TAG Sum<br>(µg/mL) | 165.033 | 243.399 | 100.00% | 268.125 | 396.008 | 100.00% | 491.697 | 726.277 | 100.00% | 1116.045 | 1650.284 | 100.00% | 2233.905 | 3301.629 | 100.00% |
| FSV Sum<br>(µg/mL) | 2.451   | 5.605   | 100.00% | 2.901   | 6.710   | 100.00% | 4.252   | 10.024  | 100.00% | 6.503    | 15.548   | 100.00% | 11.005   | 26.597   | 100.00% |

**Supplementary Table S2.**

Solvent gradient for the first dimension, <sup>1</sup>D, of three dimensions of separation.

|      | Ch. A | Ch. D |
|------|-------|-------|
| Time | %MeOH | %DCM  |
| 0    | 75    | 25    |
| 5    | 75    | 25    |
| 25   | 65    | 35    |
| 40   | 62.5  | 37.5  |
| 52   | 45    | 55    |
| 62.5 | 20    | 80    |
| 64   | 10    | 90    |
| 65   | 75    | 25    |
| 75   | 75    | 25    |

**Supplementary Table S3.** Gradient program for first second dimension, <sup>2</sup>D(1), as it should be entered in the Agilent OpenLab Chemstation 2D-LC workstation software program.

| <sup>2</sup> D Time | <sup>1</sup> D Time: |      |       |       |       |       |       |       |       |       |
|---------------------|----------------------|------|-------|-------|-------|-------|-------|-------|-------|-------|
|                     | 0                    | 9.55 | 11.46 | 21.01 | 24.83 | 26.74 | 30.56 | 32.47 | 44.12 | 74.49 |
| 0                   | 0                    | 0    | 25    | 0     | 45    | 35    | 25    | 5     | 0     | 0     |
| 0.3                 | 0                    | 0    | 25    | 0     | 45    | 35    | 25    | 5     | 0     | 0     |
| 1.3                 | 5                    | 5    | 40    | 15    | 65    | 55    | 45    | 37    | 5     | 5     |
| 1.6                 | 5                    | 5    | 45    | 15    | 70    | 60    | 50    | 42    | 5     | 5     |
| 1.7                 | 0                    | 0    | 25    | 0     | 45    | 35    | 25    | 5     | 0     | 0     |

**Supplementary Table S4.** Solvent program  
gradient for the second second dimension,  
<sup>2</sup>D(2), UHPLC separation on a Ag<sup>+</sup> ion column.

|      | Ch. A | Ch. B | Ch. D | Flow Rate |
|------|-------|-------|-------|-----------|
| Time | %MeOH | %ACN  | %DCM  | mL/min    |
| 0    | 0     | 100   | 0     | 1.00      |
| 5    | 0     | 100   | 0     | 1.00      |
| 10   | 13.91 | 75.09 | 11    | 1.00      |
| 20   | 42.1  | 44.9  | 13    | 1.00      |
| 21   | 44.94 | 41.86 | 13.2  | 1.00      |
| 25   | 56.39 | 29.61 | 14    | 1.00      |
| 29   | 42.98 | 42.09 | 14.93 | 1.10      |
| 30   | 39.4  | 45.3  | 15.3  | 1.05      |
| 34   | 24.41 | 58.59 | 17    | 0.90      |
| 35   | 20.5  | 62    | 17.5  | 1.00      |
| 39   | 4.17  | 75.13 | 20.7  | 0.90      |
| 40   | 0     | 78.6  | 21.4  | 0.90      |
| 44   | 0     | 74    | 26    | 0.90      |
| 45   | 0     | 73    | 27    | 1.15      |
| 49   | 0     | 68    | 32    | 1.10      |
| 50   | 0     | 67    | 33    | 1.10      |
| 55   | 0     | 58    | 42    | 1.00      |
| 56   | 0     | 56    | 44    | 1.00      |
| 60   | 0     | 45    | 55    | 1.00      |
| 64   | 0     | 32    | 68    | 1.00      |
| 65   | 2     | 28    | 70    | 1.00      |
| 69   | 15    | 10    | 75    | 1.00      |
| 70   | 0     | 100   | 0     | 1.00      |
| 75   | 0     | 100   | 0     | 1.00      |

**Supplementary Table S5.** Critical Ratio 2, or  $[AA]^+/[AB]^+$ , from triacylglycerol (TAG) regioisomer standards by electrospray ionization (ESI) high-resolution, accurate-mass (HRAM) mass spectrometry (MS) using LipidSearch and atmospheric pressure chemical ionization (APCI)-MS using QuanBrowser. Sorted by ESI-MS 1,3-isomer values.

| TAG <sup>a</sup> | ESI-MS<br>1,3-Isomer | SD   | ESI-MS<br>1,2-Isomer | SD   | APCI-MS<br>1,3-Isomer | SD   | APCI-MS<br>1,2-Isomer | SD   |
|------------------|----------------------|------|----------------------|------|-----------------------|------|-----------------------|------|
| OPO/OOP          | 0.29                 | 0.01 | 0.52                 | 0.03 | 0.51                  | 0.04 | 0.78                  | 0.06 |
| OSO/OOS          | 0.31                 | 0.01 | 0.58                 | 0.02 | 0.18                  | 0.02 | 0.36                  | 0.03 |
| LPL/LLP          | 0.33                 | 0.01 | 0.54                 | 0.05 | 0.39                  | 0.06 | 0.98                  | 0.07 |
| LaMLa/LaLaM      | 0.33                 | 0.01 | 0.63                 | 0.02 | 0.19                  | 0.02 | 0.59                  | 0.01 |
| OAo/OOA          | 0.33                 | 0.01 | 0.60                 | 0.02 | 0.22                  | 0.01 | 0.71                  | 0.05 |
| LaPLa/LaLaP      | 0.35                 | 0.01 | 0.71                 | 0.03 | 0.38                  | 0.05 | 0.99                  | 0.08 |
| SOS/SSO          | 0.35                 | 0.01 | 0.64                 | 0.03 | 0.23                  | 0.01 | 0.68                  | 0.05 |
| OLO/OOL          | 0.36                 | 0.01 | 0.57                 | 0.02 | 0.22                  | 0.02 | 0.69                  | 0.12 |
| CaMca/CaCaM      | 0.37                 | 0.02 | 0.79                 | 0.06 | 0.26                  | 0.02 | 1.02                  | 0.08 |
| POP/PPO          | 0.37                 | 0.01 | 0.68                 | 0.02 | 0.18                  | 0.02 | 0.59                  | 0.06 |
| LOL/LLO          | 0.38                 | 0.03 | 0.63                 | 0.02 | 0.41                  | 0.02 | 1.29                  | 0.12 |
| PLP/PPL          | 0.39                 | 0.03 | 0.71                 | 0.02 | 0.21                  | 0.02 | 0.52                  | 0.07 |
| LaOLa/LaLaO      | 0.41                 | 0.02 | 0.82                 | 0.03 | 0.27                  | 0.02 | 1.08                  | 0.07 |
| ODhO/ODdh        | 0.56                 | 0.02 | 0.40                 | 0.03 | 4.97                  | 0.23 | 11.43                 | 1.74 |
| <b>ABC/ABC</b>   | ([AC]/([AB]+[BC]))   |      | ([AC]/([AB]+[BC]))   |      | ([AC]/([AB]+[BC]))    |      | ([AC]/([AB]+[BC]))    |      |
| POLa/OLaP        | 0.40                 | 0.01 | 0.24                 | 0.02 | 0.26                  | 0.02 | 0.18                  | 0.01 |
| PLO/OPL          | 0.37                 | 0.01 | 0.30                 | 0.02 | 0.13                  | 0.01 | 0.45                  | 0.03 |
| POS/SPO          | 0.36                 | 0.01 | 0.31                 | 0.01 | 0.17                  | 0.01 | 0.25                  | 0.02 |
| SLO/SOL          | 0.36                 | 0.03 | 0.33                 | 0.02 | 0.20                  | 0.04 | 0.70                  | 0.07 |
|                  | [BC]/[AB]            | SD   | [BC]/[AB]            | SD   | [BC]/[AB]             | SD   | [BC]/[AB]             | SD   |
| POLa/OLaP        | 1.30                 | 0.10 | 1.89                 | 0.12 | 0.92                  | 0.05 | 1.49                  | 0.05 |
| PLO/OPL          | 0.95                 | 0.05 | 0.96                 | 0.03 | 1.49                  | 0.09 | 1.97                  | 0.31 |
| POS/SPO          | 0.96                 | 0.05 | 0.93                 | 0.02 | 1.05                  | 0.05 | 1.49                  | 0.08 |
| SLO/SOL          | 0.97                 | 0.04 | 0.90                 | 0.04 | 0.82                  | 0.09 | 1.11                  | 0.08 |

<sup>a</sup>Fatty acid abbreviations in Materials and Methods.

**Supplementary Table S6.** Quantification of regioisomers as %AAB based on Critical Ratio 2, [AA]<sup>+</sup>/[AB]<sup>+</sup>, for triacylglycerols (TAGs). See Critical Ratio 2 values in Supplementary Table 2. Part 1: APCI-MS; Part 2: ESI-MS using LipidSearch (LS); Part 3: ESI-MS using QuanBrowser (QB). Abbreviations in Materials and Methods.

| <b><sup>1</sup>D: APCI-MS</b>        |       |        | Pinto Beans | Navy Beans    | Cranberry Beans | Black Beans | Black-Eyed Peas | Baby Lima Beans | Butter Beans | Lentils      | Green Split Peas | Garbanzo Beans |
|--------------------------------------|-------|--------|-------------|---------------|-----------------|-------------|-----------------|-----------------|--------------|--------------|------------------|----------------|
| TAG                                  | RT    | SD     | %AAB        | %AAB          | %AAB            | %AAB        | %AAB            | %AAB            | %AAB         | %AAB         | %AAB             | %AAB           |
| LOL/LLO                              | 33.40 | ± 0.37 | 94.6%       | 76.2%         | 78.1%           | 84.4%       | 100.0%          | 69.9%           | 80.2%        | 64.7%        | 67.8%            | 75.7%          |
| LPL/LLP                              | 34.18 | ± 0.43 | 100.0%      | 100.0%        | 100.0%          | 100.0%      | 100.0%          | 100.0%          | 100.0%       | 100.0%       | 100.0%           | 100.0%         |
| OLO/OOL                              | 36.79 | ± 0.45 | 80.8%       | 40.6%         | 100.0%          | 51.0%       | 100.0%          | 84.1%           | 100.0%       | 73.9%        | 77.8%            | 43.8%          |
| PLP/PPL                              | 38.71 | ± 0.57 | 0.0%        | 4.6%          | 0.0%            | 0.3%        | 4.6%            | 4.2%            | 4.7%         | 3.7%         | 0.6%             | 0.0%           |
| OPO/OOP                              | 41.70 | ± 0.62 | 100.0%      | 58.9%         | 100.0%          | 100.0%      | 100.0%          | 100.0%          | 100.0%       | 95.1%        | 100.0%           | 78.0%          |
| POP/PPO                              | 42.91 | ± 0.70 | 69.2%       | 26.3%         | 22.8%           | 4.8%        | 4.5%            | 9.7%            | 11.7%        | 7.1%         | 1.6%             | 1.6%           |
| OSO/OOS <sup>a</sup>                 | 46.28 | ± 0.76 | 100.0%      | 100.0%        | 100.0%          | 100.0%      | 100.0%          | 100.0%          | 100.0%       | 100.0%       | 100.0%           | 100.0%         |
| <b><sup>2</sup>D(2): ESI-MS (LS)</b> |       |        | Pinto Beans | Navy Beans    | Cranberry Beans | Black Beans | Black-Eyed Peas | Baby Lima Beans | Butter Beans | Lentils      | Green Split Peas | Garbanzo Beans |
| TAG                                  | RT    | SD     | %AAB        | %AAB          | %AAB            | %AAB        | %AAB            | %AAB            | %AAB         | %AAB         | %AAB             | %AAB           |
| LOL/LLO                              | 41.64 | 0.47   | 71.9%       | 76.4%         | 75.3%           | 72.9%       | 66.0%           | 74.6%           | 72.1%        | 52.1%        | 55.9%            | 63.9%          |
| LPL/LLP                              | 42.12 | 0.46   | 100.0%      | 100.0%        | 100.0%          | 100.0%      | 100.0%          | 100.0%          | 100.0%       | 100.0%       | 100.0%           | 100.0%         |
| OLO/OOL                              | 45.94 | 0.44   | 94.6%       | 99.9%         | 98.6%           | 95.7%       | 87.5%           | 97.8%           | 94.7%        | 70.9%        | 75.5%            | 85.0%          |
| PLP/PPL                              | 47.47 | 0.51   | 2.0%        | 4.1%          | 1.5%            | 1.1%        | 1.1%            | 0.3%            | 1.3%         | 2.1%         | 2.5%             | 1.3%           |
| OPO/OOP                              | 49.35 | 0.30   | -           | 100.0%        | -               | 100.0%      | 100.0%          | 100.0%          | 100.0%       | 100.0%       | 100.0%           | 100.0%         |
| POP/PPO                              | 50.45 | 0.49   | -           | -             | -               | 4.7%        | 2.9%            | 2.6%            | 2.6%         | 3.3%         | 1.5%             | 0.6%           |
| OSO/OOS                              | 52.59 | 1.03   | -           | -             | -               | -           | -               | -               | -            | -            | 96.9%            | 78.8%          |
| <b><sup>2</sup>D(2): ESI-MS (QB)</b> |       |        | Pinto Beans | Navy Beans    | Cranberry Beans | Black Beans | Black-Eyed Peas | Baby Lima Beans | Butter Beans | Lentils      | Green Split Peas | Garbanzo Beans |
| TAG                                  | RT    | SD     | %AAB        | %AAB          | %AAB            | %AAB        | %AAB            | %AAB            | %AAB         | %AAB         | %AAB             | %AAB           |
| LOL/LLO                              | 41.68 | ± 0.39 | 91.2%       | 86.5%         | 84.9%           | 83.0%       | 71.7%           | 84.9%           | 83.5%        | 58.8%        | 66.3%            | 80.6%          |
| LPL/LLP                              | 42.12 | ± 0.46 | 100.0%      | 100.0%        | 100.0%          | 100.0%      | 100.0%          | 100.0%          | 100.0%       | 100.0%       | 100.0%           | 100.0%         |
| OLO/OOL <sup>b</sup>                 | 46.12 | ± 0.26 | 67.7%       | <b>100.0%</b> | <b>97.8%</b>    | 53.8%       | -               | 35.0%           | -            | <b>93.3%</b> | <b>100.0%</b>    | 80.6%          |
| PLP/PPL                              | 47.64 | ± 0.32 | 5.5%        | 11.6%         | 4.1%            | 5.4%        | 4.6%            | 1.8%            | 4.6%         | 5.8%         | 6.9%             | 5.1%           |
| OPO/OOP                              | 49.31 | ± 0.33 | -           | 100.0%        | -               | 100.0%      | 100.0%          | 100.0%          | 100.0%       | 100.0%       | 100.0%           | 100.0%         |
| POP/PPO                              | 50.42 | ± 0.49 | -           | -             | -               | 6.9%        | 5.1%            | 4.8%            | 4.8%         | 5.5%         | 3.7%             | 2.9%           |
| OSO/OOS                              | 53.28 | ± 0.26 | -           | -             | -               | -           | -               | -               | -            | 88.5%        | 100.0%           | 94.5%          |

<sup>a</sup>[OS]<sup>+</sup> fragment smaller than normal; [OO]<sup>+</sup>/[OS]<sup>+</sup> out of range.

<sup>b</sup>One of two CR2 values was high for bolded values.

**Supplementary Figure 1**

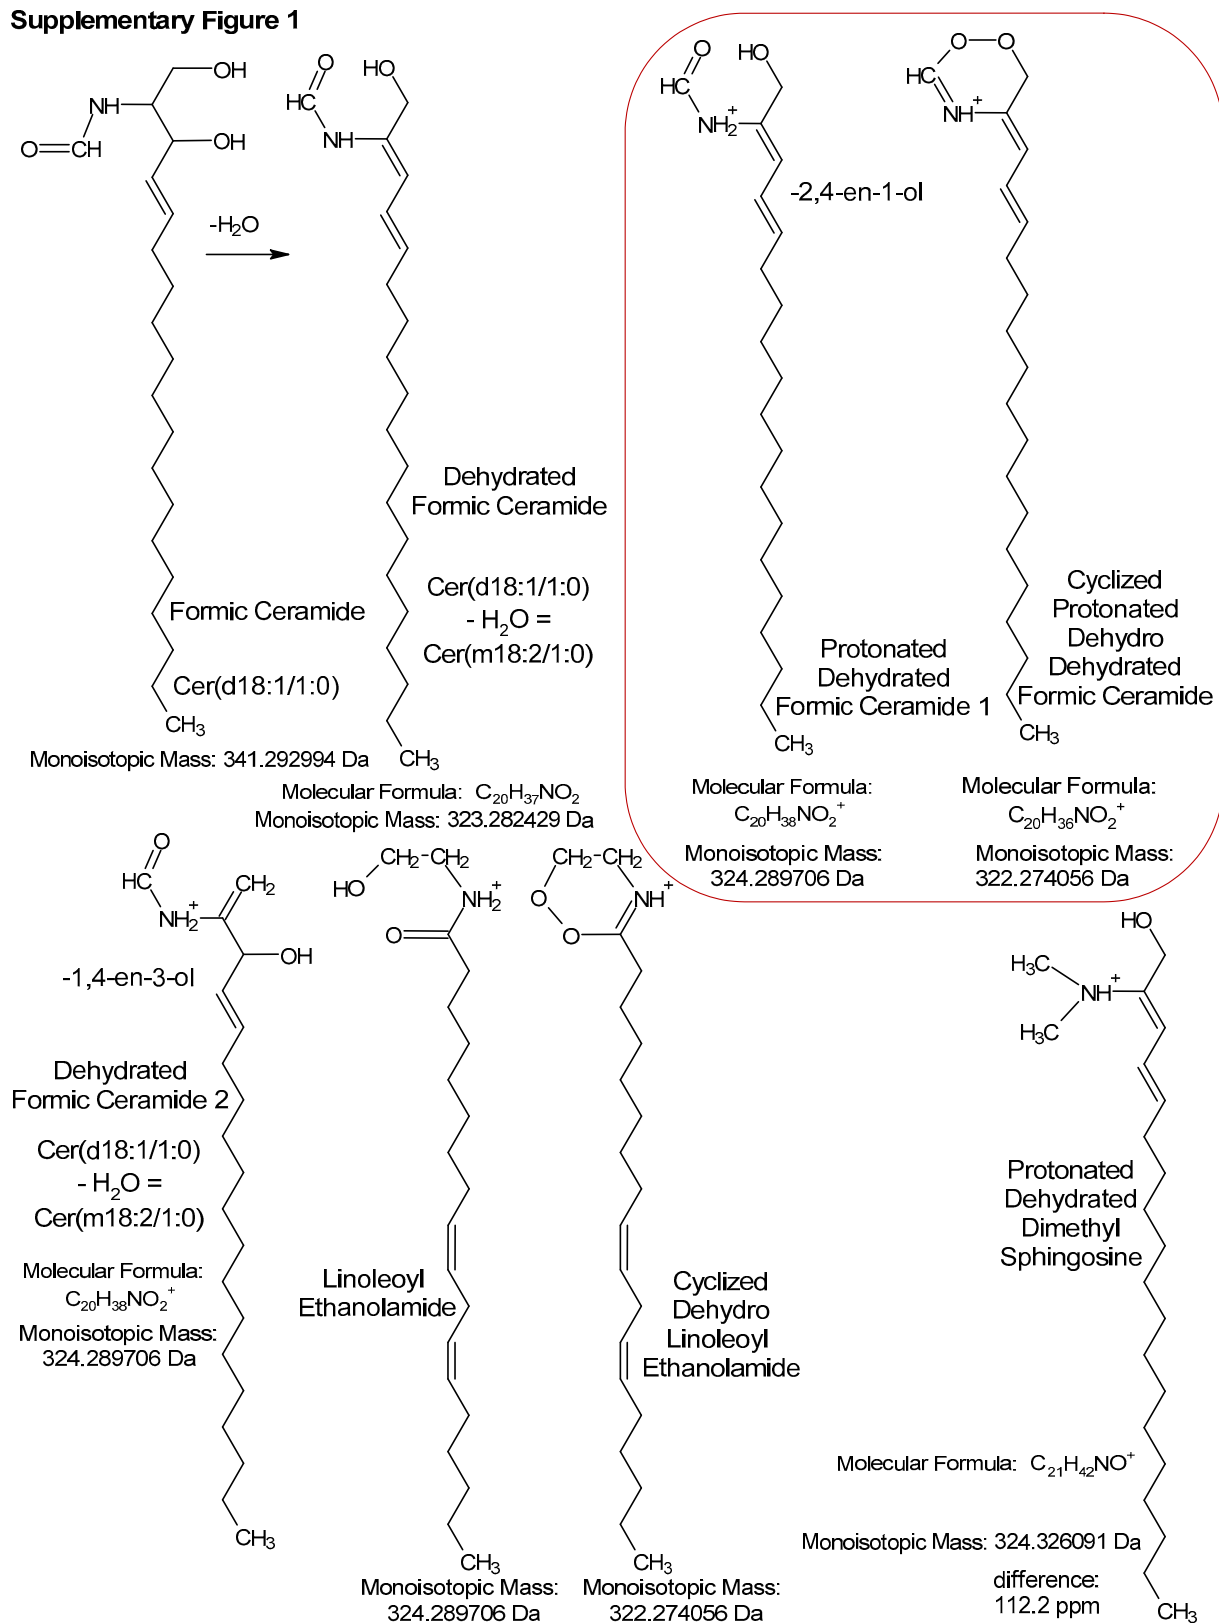

**Supplementary Figure S1.** Structures of molecules having calculated  $m/z$  values of 324.2897 and 324.3261.



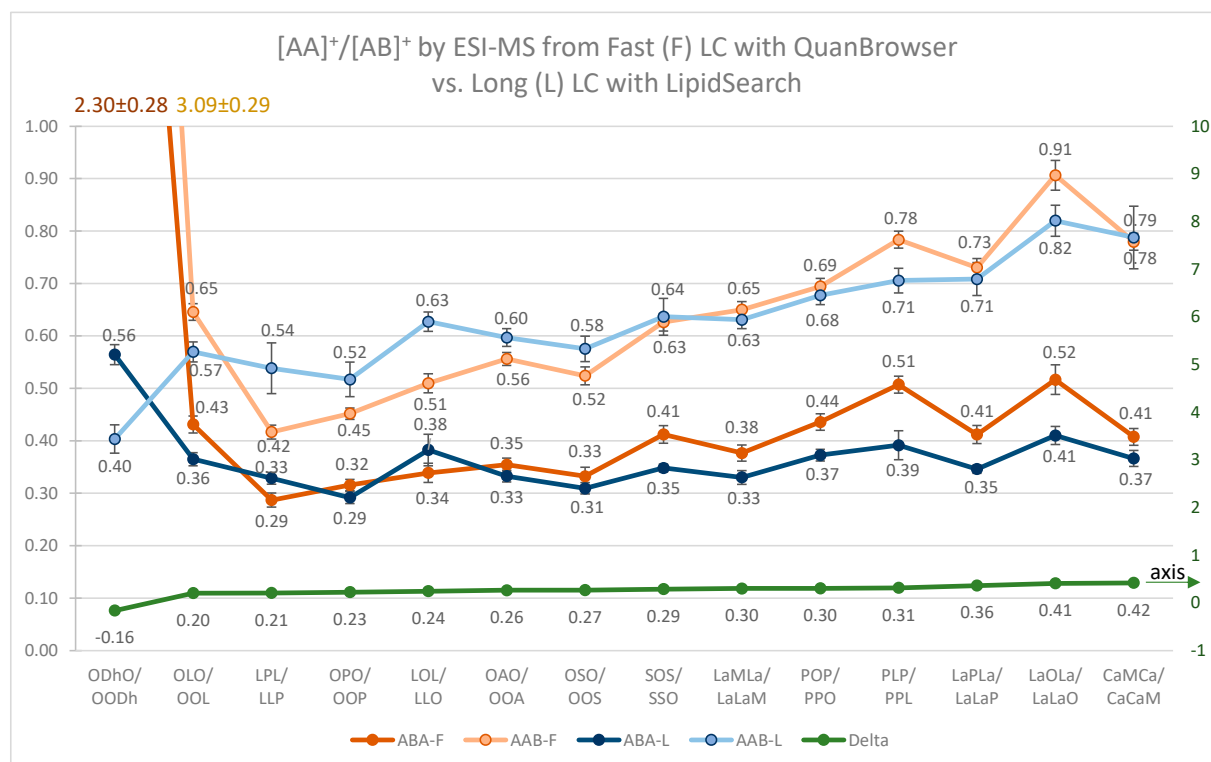

**Supplementary Figure S2.** Critical Ratio 2 (CR2), [AA]<sup>+</sup>/[AB]<sup>+</sup>, of pulse triacylglycerols by electrospray ionization (ESI) high-resolution, accurate-mass (HRAM) mass spectrometry (MS) sorted by the difference between CR2 for ABA versus AAB TAG regioisomers,  $\Delta$ CR2. The  $\Delta$ CR2 values (in green, right axis) from only the current data are listed. CR2 values are compared to those from fast chromatography, previously reported [3]. CR2 for ODhO/OODh not shown for fast LC APPI-MS data. Fatty acid abbreviations in Materials and Methods.
